# Supplementary material for: The Long COVID experience from a patient's perspective: a clustering analysis of 27,216 Reddit posts
Source: Front Public Health. 2023 Aug 17;11:1227807. doi: 10.3389/fpubh.2023.1227807 (PMC10470115; doi:10.3389/fpubh.2023.1227807)
Supplement: Supplementary Material 3 — Categorization of PASC lexicon symptoms. [file Table_3.XLSX]

## Sheet: Feuille 1
Category	Symptoms
Other Symptoms	sexual dysfunction, priapism, dyspareunia, libido disorder, breast lump, breast tenderness, grinding teeth, hypotrichosis, facial hemiatrophy, hypertrophy of nail, gynecomastia, enlarged breast, galactorrhea, palpable mass, coma, jaundice
General	fatigue, fever, bleeding, weight loss, weakness, paresthesia, weight gain, chills, loss of appetite, hair loss, weight change, cold sweat, sweating, night sweats, feels cold, hyperthermia, hypothermia, cold extremities, dysesthesia, increased appetite, multiple symptoms, anaphylaxis, burning sensation, warm skin, hungry, inadequate oral intake, tendency to bleed, thirsty, temperature intolerance,…
Body Pain/Mobility	pain, joint pain, myalgia, back pain, pain in extremities, abnormal gait, pelvic pain, joint stiffness, muscle spasms, muscle strain, muscle cramps, muscle stiffness, joint swelling, muscle weakness, cramping, muscle stiffness, musculoskeletal pain, spasm, muscle cramps, tetany, neck spasms, limitation of joint movement, joint stiffness, joint swelling, muscle twitching, muscle strain, stiffness,…
Mental Health/Psychological/Behavioral	stress, anxiety, depression, suffering, mental status change, suicidal, mania, combativeness, personality change, panic, crying associated with mood, agitation, mood swings, irritable, hypomania, self-harm, anhedonia, loss of motivation, manic mood, claustrophobia, homicidal thoughts, impulsive character, paranoia, feeling unhappy, feeling lonely, dysphoria, feeling bad, loss of interest, abusive…
Sleep	insomnia, sleep apnea, sleep disorder, somnolence, excessive somnolence
Otorhinolaryngology	sinonasal congestion, nasal symptoms, pain in throat, problem with smell or taste, tongue burning, black hairy tongue, sore tongue, oral tingling, oropharyngeal swelling,ear blocked, nasal obstruction, nasal polyp, throat symptom, throat tightness, dry mouth, throat swelling, lump in throat, itchy throat, gum hyperplasia, canker sores, mucositis, oral tingling, sore tongue, throat symptom, tongue…
Neurological/Ocular	headaches, facial pain, dizziness or vertigo, visual changes,confusion, memory impairment, syncope,loss of consciousness, difficulty speaking, dry eyes, hallucinations,eye inflammation, eye swelling, eye hemorrhage, itchy eyes, unable to speak, visual hallucinations,watery eye, red eye, blurred vision, near syncope, impaired cognition, cns symptom, neuropathic pain, keratoconjunctivitis sicca, ca…
Cardiorespiratory	shortness of breath, cough, chest pain, wheezing, palpitations,respiratory depression, chest tightness, abnormal breathing, chest discomfort, murmur, bronchospasm, respiratory syndrome, arrhythmia, bradycardia, hemoptysis, stridor, sputum color change
Gastrointestinal	nausea and/or vomiting, gastroesophageal reflux, abdominal pain, constipation,diarrhea,gastrointestinal hemorrhage, abdominal bloating,blood in stools, gi upset, gastrointestinal symptom, hard stool, soft stool, hyperemesis, hard stool, passing gas, dyspepsia, altered bowel function, incontinence of feces, burping, feces color: tarry, erythematous mucosa, intolerance to food, early satiety, esoph…
Vascular/Lymphatic	bruising, lymphadenopathy, laryngeal edema, lymphedema, fluid retention, thrombophlebitis, peripheral edema, edema, swelling
Urinary	lower urinary tract symptoms ,urinary incontinence,hematuria, urinary changes, urinary retention, urinary changes, polyuria, oliguria, nocturia
Cutaneous	skin lesion, rash, itching, erythema ,changes in skin texture, hives, dermatitis, skin irritation, impaired skin integrity, dry skin, skin necrosis, skin hypertrophy, skin discoloration, bruising, flushing, pale, hot flushes, ecchymosis, easy bruising, cold sores, thin skin, pink skin, thick skin, chloasma, purpura, cyanosis, morbilliform rash, rash with mucosal lesions, angioedema, facial edema,…
Women's Health	vaginal bleeding, irregular periods, abnormal uterine bleeding, menstrual spotting, postcoital bleeding, menopausal symptom, menorrhagia, menstrual spotting, vaginal discharge symptom, hirsutism, dysmenorrhea, short menstrual periods, menstrual problem, amenorrhea, atrophy of vagina
